# Supplementary material for: Effect of a Herbal Therapy on Clinical Symptoms of Acute Lower Uncomplicated Urinary Tract Infections in Women: Secondary Analysis from a Randomized Controlled Trial
Source: MDPI journal article supplement (doi:10.3390/antibiotics8040256), 2019-12-07
Supplement: s1 [file s1]

### **Supplementary Table 1. Inclusion/exclusion criteria**

#### **Inclusion criteria:**

- Female outpatients aged 18–75 years
- Diagnosis of acute lower uUTI occurring for the first time or acute relapse of chronic recurrent uUTI
- Typical symptoms of cystitis (pollakisuria, dysuria and urgency)
- Bacterial count of  $10^4$  –  $10^6$  colony forming units (CFU)/mL in midstream urine
- Presence of  $>20$  leukocytes/ $\mu$ L of urine measured by dipstick test
- No antibiotic treatment required according to the investigator
- Women of childbearing potential were allowed to participate only if they used a highly effective method of contraception
- Written informed consent

#### **Exclusion criteria:**

- Known hypersensitivity to any of the active substances or excipients of the study medication
- Antibiotic treatment during the past 8 days or indication for antibiotic treatment for the current infection
- Patients with trichomoniasis, chlamydiosis or gonorrhea
- Use of concomitant medication that may have an effect on the UTI, including other phytotherapeutics with similar effects, saluretics (including those in antihypertensives) or other drugs with a similar mode of action, urinary acidifying agents (e.g., Acimethin®), antibiotics, or phytotherapeutics with possible antibiotic effects
- Patients with suspected ovarian inflammation (e.g., adnexitis)
- Patients with suspected renal inflammation (e.g., pyelonephritis)
- Patients with complicated UTI (e.g., obstruction, stones, reflux)
- Patients with overactive bladder
- Patients with vegetative urogenital syndrome
- Patients who were currently participating or had participated in another clinical trial within 30 days before enrollment
- Patients in poor general condition
- Alcohol- or drug-addicted patients
- Pregnant or nursing women or women not using highly effective methods of contraception
- Patients with mental illness or no/limited legal capacity
- Patients held in an institution by legal or official order
- Patients who were not proficient in spoken or written German
- Patients with a urine bacterial count  $>10^6$  CFU/mL were to be excluded from further participation in the study unless they specifically wished to continue treatment with the study medication.
- No contraindications against the study medication were known at the time of study protocol preparation.

**Supplementary Table 2.** Schedule of study assessments

|                                                          | Baseline<br>(Day 0)              | After 1 day<br>(Day 1) | After 6±1<br>days<br>(Day 7) |
|----------------------------------------------------------|----------------------------------|------------------------|------------------------------|
| Diagnosis, medical history, physical examination         | x                                |                        |                              |
| Inclusion/exclusion criteria                             | x                                |                        |                              |
| Safety laboratory                                        | x                                |                        | x                            |
| Urine dipstick test for leukocytes and nitrite           | x                                | x                      | x                            |
| Midstream urine culture (bacterial counts)               | x                                |                        | x                            |
| Adverse events                                           |                                  | x                      | x                            |
| Documentation of symptoms (investigator / patient diary) | x                                | x                      | x                            |
| Need for antibiotic treatment                            |                                  | x                      | x                            |
| Final evaluation (investigator and patient)              |                                  |                        | x                            |
| Treatment                                                | Continuously from Day 0 to Day 7 |                        |                              |

| ACSS Questionnaire                                                                                                                                                                                           |                                                  |                                                                                                                                                                                                                                                                                                                                                                                                                     |                                                               |                                                             |                                                                |                                                                       |
|--------------------------------------------------------------------------------------------------------------------------------------------------------------------------------------------------------------|--------------------------------------------------|---------------------------------------------------------------------------------------------------------------------------------------------------------------------------------------------------------------------------------------------------------------------------------------------------------------------------------------------------------------------------------------------------------------------|---------------------------------------------------------------|-------------------------------------------------------------|----------------------------------------------------------------|-----------------------------------------------------------------------|
| First visit (diagnostic form) - Part A                                                                                                                                                                       |                                                  |                                                                                                                                                                                                                                                                                                                                                                                                                     |                                                               |                                                             |                                                                |                                                                       |
| Time: ____:____ Date of evaluation: ____/____/____ (dd/mm/yyyy)                                                                                                                                              |                                                  |                                                                                                                                                                                                                                                                                                                                                                                                                     |                                                               |                                                             |                                                                |                                                                       |
| Please indicate whether you have had the following symptoms during the past 24 hours, and how severe they were:<br>(Please mark <input checked="" type="checkbox"/> <u>only one</u> answer for each symptom) |                                                  |                                                                                                                                                                                                                                                                                                                                                                                                                     |                                                               |                                                             |                                                                |                                                                       |
|                                                                                                                                                                                                              |                                                  | 0                                                                                                                                                                                                                                                                                                                                                                                                                   | 1                                                             | 2                                                           | 3                                                              |                                                                       |
| Typical                                                                                                                                                                                                      | 1                                                | Frequent urination of small volumes of urine (going to the toilet very often)                                                                                                                                                                                                                                                                                                                                       | <input type="checkbox"/> No<br><i>4 or less times per day</i> | <input type="checkbox"/> Yes, mild<br><i>5-6 times/ day</i> | <input type="checkbox"/> Yes, moderate<br><i>7-8 times/day</i> | <input type="checkbox"/> Yes, severe<br><i>9-10 or more times/day</i> |
|                                                                                                                                                                                                              | 2                                                | Urgent urination (a strong and uncontrollable urge to pass urine)                                                                                                                                                                                                                                                                                                                                                   | <input type="checkbox"/> No                                   | <input type="checkbox"/> Yes, mild                          | <input type="checkbox"/> Yes, moderate                         | <input type="checkbox"/> Yes, severe                                  |
|                                                                                                                                                                                                              | 3                                                | Feeling pain or burning when passing urine                                                                                                                                                                                                                                                                                                                                                                          | <input type="checkbox"/> No                                   | <input type="checkbox"/> Yes, mild                          | <input type="checkbox"/> Yes, moderate                         | <input type="checkbox"/> Yes, severe                                  |
|                                                                                                                                                                                                              | 4                                                | Incomplete bladder emptying after urination                                                                                                                                                                                                                                                                                                                                                                         | <input type="checkbox"/> No                                   | <input type="checkbox"/> Yes, mild                          | <input type="checkbox"/> Yes, moderate                         | <input type="checkbox"/> Yes, severe                                  |
|                                                                                                                                                                                                              | 5                                                | Pain or uncomfortable pressure in the lower abdomen (suprapubic area)                                                                                                                                                                                                                                                                                                                                               | <input type="checkbox"/> No                                   | <input type="checkbox"/> Yes, mild                          | <input type="checkbox"/> Yes, moderate                         | <input type="checkbox"/> Yes, severe                                  |
|                                                                                                                                                                                                              | 6                                                | Visible blood in your urine                                                                                                                                                                                                                                                                                                                                                                                         | <input type="checkbox"/> No                                   | <input type="checkbox"/> Yes, mild                          | <input type="checkbox"/> Yes, moderate                         | <input type="checkbox"/> Yes, severe                                  |
| Sum of "Typical" scores=                                                                                                                                                                                     |                                                  |                                                                                                                                                                                                                                                                                                                                                                                                                     |                                                               |                                                             | points                                                         |                                                                       |
| Differential                                                                                                                                                                                                 | 7                                                | Loin (low back) pain*                                                                                                                                                                                                                                                                                                                                                                                               | <input type="checkbox"/> No                                   | <input type="checkbox"/> Yes, mild                          | <input type="checkbox"/> Yes, moderate                         | <input type="checkbox"/> Yes, severe                                  |
|                                                                                                                                                                                                              | 8                                                | Vaginal discharge (especially in the mornings)                                                                                                                                                                                                                                                                                                                                                                      | <input type="checkbox"/> No                                   | <input type="checkbox"/> Yes, mild                          | <input type="checkbox"/> Yes, moderate                         | <input type="checkbox"/> Yes, severe                                  |
|                                                                                                                                                                                                              | 9                                                | Urethral discharge (without urination)                                                                                                                                                                                                                                                                                                                                                                              | <input type="checkbox"/> No                                   | <input type="checkbox"/> Yes, mild                          | <input type="checkbox"/> Yes, moderate                         | <input type="checkbox"/> Yes, severe                                  |
|                                                                                                                                                                                                              | 10                                               | High body temperature (chills/fever)<br>(Please indicate <input checked="" type="checkbox"/> if measured)                                                                                                                                                                                                                                                                                                           | <input type="checkbox"/> No<br>≤37.5 °C                       | <input type="checkbox"/> Yes, mild<br>37.6-37.9 °C          | <input type="checkbox"/> Yes, moderate<br>38.0-38.9 °C         | <input type="checkbox"/> Yes, severe<br>≥39.0 °C                      |
| * often unilateral (on one side)                                                                                                                                                                             |                                                  |                                                                                                                                                                                                                                                                                                                                                                                                                     |                                                               |                                                             | Sum of "Differential" scores=                                  | points                                                                |
| Quality of life                                                                                                                                                                                              | 11                                               | Please give an overall rating of how much these symptoms, mentioned above, bothered you in the past 24 hours (Please mark <input checked="" type="checkbox"/> <u>only one</u> answer)                                                                                                                                                                                                                               |                                                               |                                                             |                                                                |                                                                       |
|                                                                                                                                                                                                              |                                                  | <input type="checkbox"/> 0 Do not feel any discomfort (No symptoms at all. Felt as good as usual)<br><input type="checkbox"/> 1 Feeling little discomfort (Feeling somewhat worse than usual)<br><input type="checkbox"/> 2 Feeling moderate discomfort (Feeling quite bad)<br><input type="checkbox"/> 3 Feeling extreme discomfort (Feeling terrible)                                                             |                                                               |                                                             |                                                                |                                                                       |
|                                                                                                                                                                                                              | 12                                               | Please choose the number, which most closely describes your normal work/everyday activities were affected by your symptoms, mentioned above, in the past 24 hours (Please mark <input checked="" type="checkbox"/> <u>only one</u> answer)                                                                                                                                                                          |                                                               |                                                             |                                                                |                                                                       |
|                                                                                                                                                                                                              |                                                  | <input type="checkbox"/> 0 Not affected at all (Carrying out usual daily activities)<br><input type="checkbox"/> 1 Mildly affected (Able to carry out daily activities with some discomfort)<br><input type="checkbox"/> 2 Moderately affected (Only able to carry out daily activities with significant effort)<br><input type="checkbox"/> 3 Extremely affected (Almost impossible to carry out daily activities) |                                                               |                                                             |                                                                |                                                                       |
| Additional                                                                                                                                                                                                   | 13                                               | Please indicate, how much your social activities were affected by your symptoms, mentioned above, in the past 24 hours (Please mark <input checked="" type="checkbox"/> <u>only one</u> answer)                                                                                                                                                                                                                     |                                                               |                                                             |                                                                |                                                                       |
|                                                                                                                                                                                                              |                                                  | <input type="checkbox"/> 0 Not affected at all (Able to enjoy normal social activities)<br><input type="checkbox"/> 1 Mildly affected (Not able to do some social activities)<br><input type="checkbox"/> 2 Moderately affected (Only able to do a few social activities)<br><input type="checkbox"/> 3 Extremely affected (Not able to do any social activity - symptoms keep me a 'prisoner' in my home)          |                                                               |                                                             |                                                                |                                                                       |
|                                                                                                                                                                                                              | Sum of "QoL" scores=                             |                                                                                                                                                                                                                                                                                                                                                                                                                     |                                                               |                                                             |                                                                | points                                                                |
|                                                                                                                                                                                                              | 14                                               | Please indicate whether you have the followings today:                                                                                                                                                                                                                                                                                                                                                              |                                                               |                                                             |                                                                |                                                                       |
|                                                                                                                                                                                                              | Menstruation (women's monthly period) ?          | <input type="checkbox"/> No                                                                                                                                                                                                                                                                                                                                                                                         | <input type="checkbox"/> Yes                                  |                                                             |                                                                |                                                                       |
|                                                                                                                                                                                                              | Premenstrual symptoms?                           | <input type="checkbox"/> No                                                                                                                                                                                                                                                                                                                                                                                         | <input type="checkbox"/> Yes                                  |                                                             |                                                                |                                                                       |
|                                                                                                                                                                                                              | Symptoms of the menopause ?                      | <input type="checkbox"/> No                                                                                                                                                                                                                                                                                                                                                                                         | <input type="checkbox"/> Yes                                  |                                                             |                                                                |                                                                       |
|                                                                                                                                                                                                              | Are you pregnant?                                | <input type="checkbox"/> No                                                                                                                                                                                                                                                                                                                                                                                         | <input type="checkbox"/> Yes                                  |                                                             |                                                                |                                                                       |
|                                                                                                                                                                                                              | Do you have diabetes mellitus (sugar diabetes) ? | <input type="checkbox"/> No                                                                                                                                                                                                                                                                                                                                                                                         | <input type="checkbox"/> Yes                                  |                                                             |                                                                |                                                                       |



**STOP**

Please do not forget to return completed questionnaire back to your physician

Thank you for cooperation

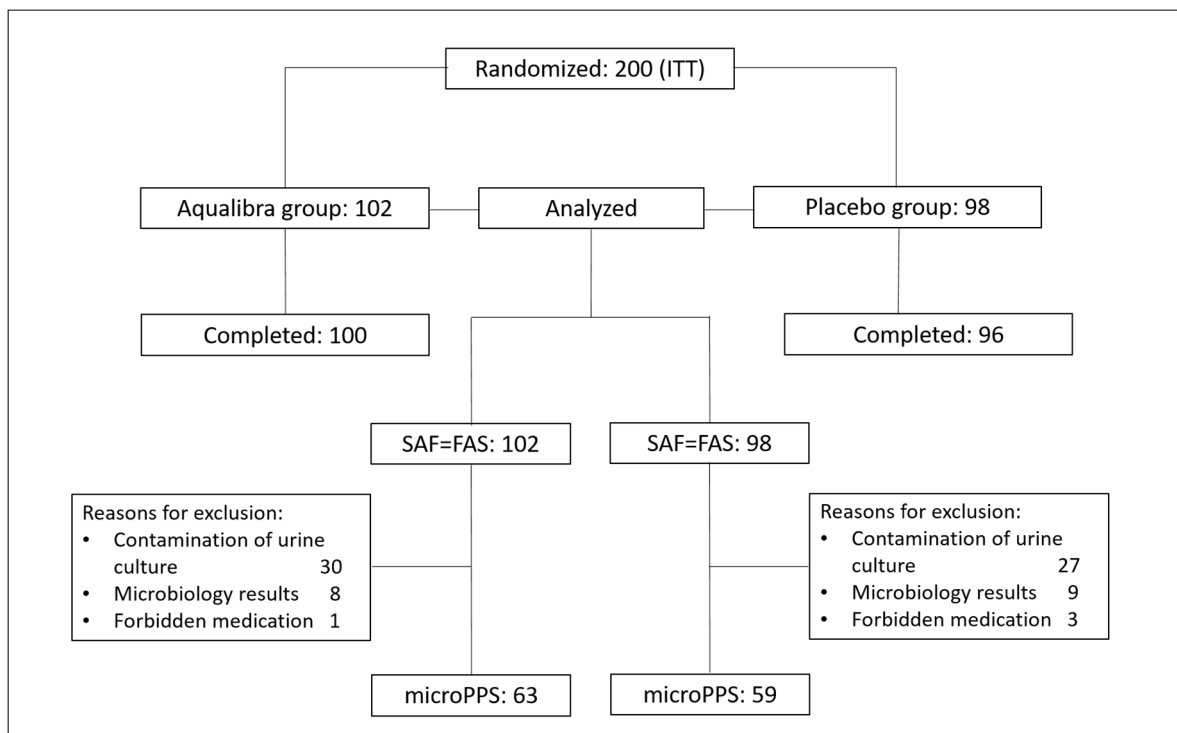

**Supplementary Figure 1.** Disposition of patients. FAS: full analysis set; ITT: intention-to-treat; microPPS: per-protocol set (patients with evaluable microbiologic data: patients with a bacterial count  $\geq 10^4$  CFU/mL at the time of inclusion, whose urine cultures were not contaminated and who did not take any concomitant medication that could interfere with urine culture); SAF: safety analysis set.

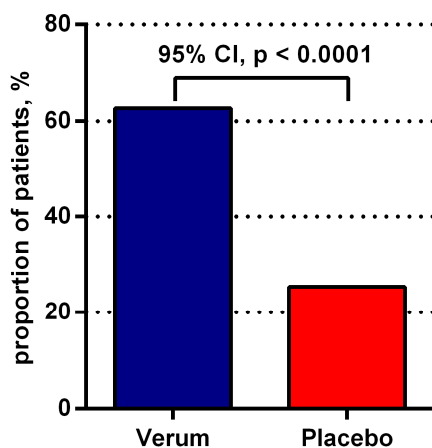

**Supplementary Figure 2.** Secondary analysis of the primary endpoint using microbiologic response criteria as defined by current draft guidelines (i.e., a bacterial count reduction from  $\geq 10^5$  to  $<10^3$  CFU/mL).

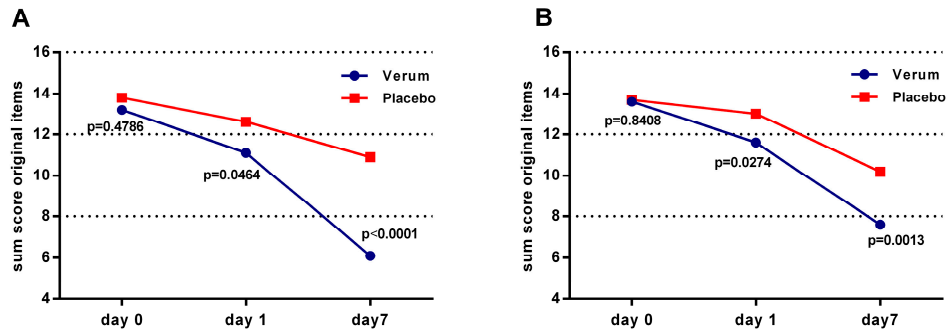

**Supplementary Figure 3.** Comparison of mean sum-scores of clinical symptoms based on the originally documented symptoms (original items) from Day 0 to Day 7 in the (A) microPP and (B) ITT population.
